# Supplementary material for: A bacterial cellulose-polydopamine based injectable hydrogel for enhanced hemostasis in acute wounds
Source: Royal Society of Chemistry journal article supplement (doi:10.1039/d5bm00420a), 2025-01-01
Supplement: d5bm00420a1.pdf [file d5bm00420a1.pdf]

Supplementary Information

Bacterial Cellulose-Polydopamine based Injectable Composite Hydrogel for  
Enhanced Hemostasis in Acute Wounds

Kaushal R Shakya<sup>1</sup>, Niranjana Chatterjee<sup>2</sup>, Santosh K. Misra<sup>2</sup>, Vivek Verma<sup>1,3,4,5\*</sup>

<sup>1</sup>Department of Materials Science and Engineering, Indian Institute of Technology Kanpur, Kanpur-  
208016, India.

<sup>2</sup>Department of Biological Sciences and Bioengineering, Indian Institute of Technology Kanpur,  
Kanpur- 208016, India.

<sup>3</sup>Samtel Centre for Display Technologies, Indian Institute of Technology Kanpur, Kanpur- 208016,  
India.

<sup>4</sup>National Centre for Flexible Electronics, Indian Institute of Technology Kanpur, Kanpur- 208016,  
India.

<sup>5</sup>Centre of Environmental Science and Engineering, Indian Institute of Technology Kanpur, Kanpur-  
208016, India.

corresponding author: [vverma@iitk.ac.in](mailto:vverma@iitk.ac.in)

Table S1: Comparative description of previously reported hydrogels used for hemostatic outcomes in respect to preparation methods, advantages, and limitations.

| Method/Material                                                                                                                                                                                                     | Advantages                                                                                                                                                | Limitations                                                                                                                                                                                                                                                                       | Ref.         |
|---------------------------------------------------------------------------------------------------------------------------------------------------------------------------------------------------------------------|-----------------------------------------------------------------------------------------------------------------------------------------------------------|-----------------------------------------------------------------------------------------------------------------------------------------------------------------------------------------------------------------------------------------------------------------------------------|--------------|
| <b>Blue-light-activated double-network strategy</b><br>AC/PDM Hydrogel:<br>-Allyl cellulose (AC)<br>-P (Dopamine methacrylamide) (PDM)<br>Photo-initiator:<br>lithiumphenyl-2,4,6-trimethylbenzoylphosphinate (LAP) | -Strong tissue adhesive strength<br>-Fast gelation<br>-Antibacterial properties<br>-Tissue-like mechanical strength                                       | - The use of AC and PDM prolongs and complicates the fabrication process.<br>- The photo-initiator limited penetration depth may result in incomplete curing.<br>material based on photo initiator can be delicate, limiting their robustness.                                    | <sup>1</sup> |
| <b>One-step physical cross-linking method</b><br>Quaternary ammonium chitosan /tannic acid (TA)<br>Cross-linked by dynamic ionic bonds and hydrogen bonds between QCS and TA                                        | -Superior reactive oxygen species scavenging activity<br>-Broad-spectrum antibacterial ability<br>-Rapid hemostatic capability                            | -The whole system is based on ionic and hydrogen bonds which may not provide full potential of material.                                                                                                                                                                          | <sup>2</sup> |
| <b>Chitosan-based hydrogels</b><br>Cross-linked by 3-(3,4-dihydroxyphenyl) propionic acid-modified chitosan (DCS)<br>Sebacic acid-terminated polyethylene glycol modified by p-hydroxybenzaldehyde (PEGSH)          | -Suitable stretchability (~780%)<br>-High blood absorbability (1300% ± 50%)<br>-Strong adhesion (~68.5 kPa)<br>-Stretchable, self-adhesive, antibacterial | -Requires precise regulation of PEGSH proportion for favorable cytocompatibility<br>-Involves extensive processing and complex modifications.                                                                                                                                     | <sup>3</sup> |
| <b>Incorporation of Keratin–catechin nanoparticles (KE-NPs) into cellulose hydrogel</b><br>-Sodium carboxymethyl cellulose<br>-Keratin–catechin nanoparticles (KE-NPs)                                              | -Enhances mechanical properties<br>-Provides antioxidant and antimicrobial properties                                                                     | -Nanoparticles agglomeration poses Dispersion challenges.<br>-Stirring the mixture in the dark under nitrogen protection at 37 °C makes the process complex.<br>-Adding nanoparticles suspension with 0-2.5% w/w concentration complicates the weighing and solution preparation. | <sup>4</sup> |
| <b>Current work: BC/PDA/CMC hydrogel</b><br>-Bacterial cellulose (BC)<br>-Polydopamine (PDA)<br>-Carboxymethyl cellulose (CMC)                                                                                      | -Simple synthesis method<br>-Easy storage conditions<br>-No complex procedures used<br>-Good hemostatic and antioxidant property                          | -less adhesive nature                                                                                                                                                                                                                                                             | -            |

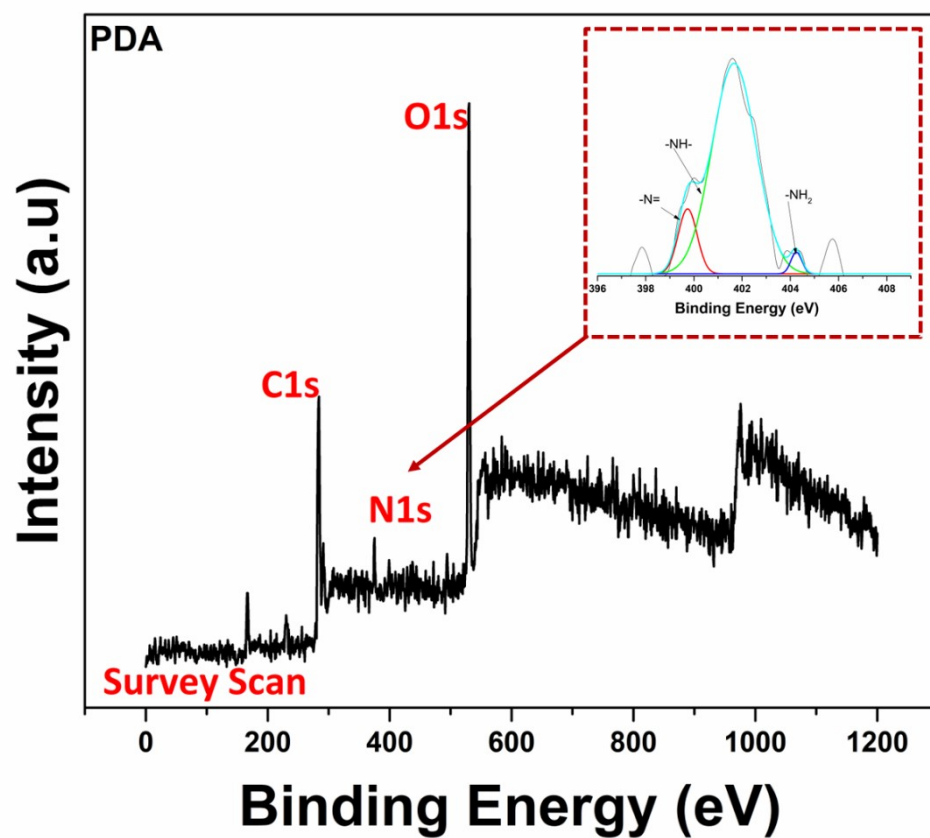

Figure S1: XPS survey spectra of polydopamine (PDA) with inset showing deconvoluted peak of nitrogen.

## Supplementary Information

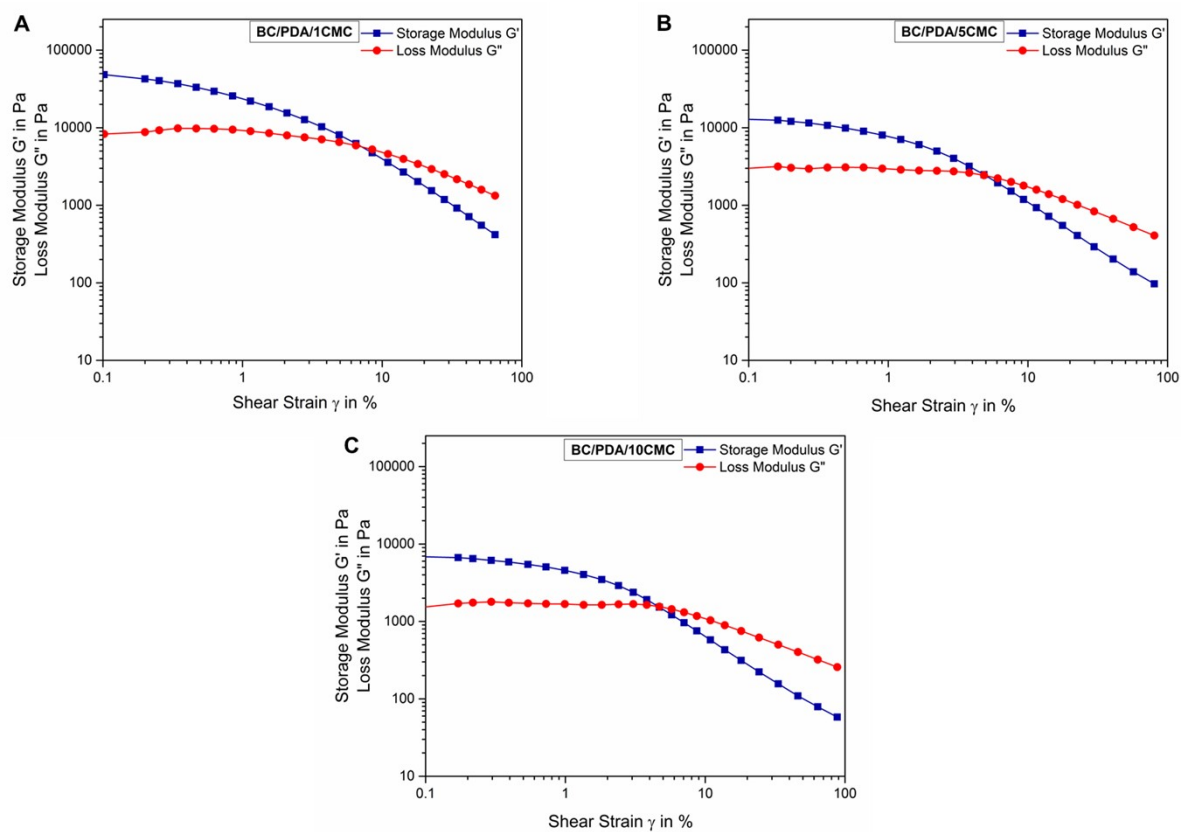

Figure S2: Strain sweep graph of (A) BC/PDA/1CMC (B) BC/PDA/5CMC and (C) BC/PDA/10CMC samples.

# Supplementary Information

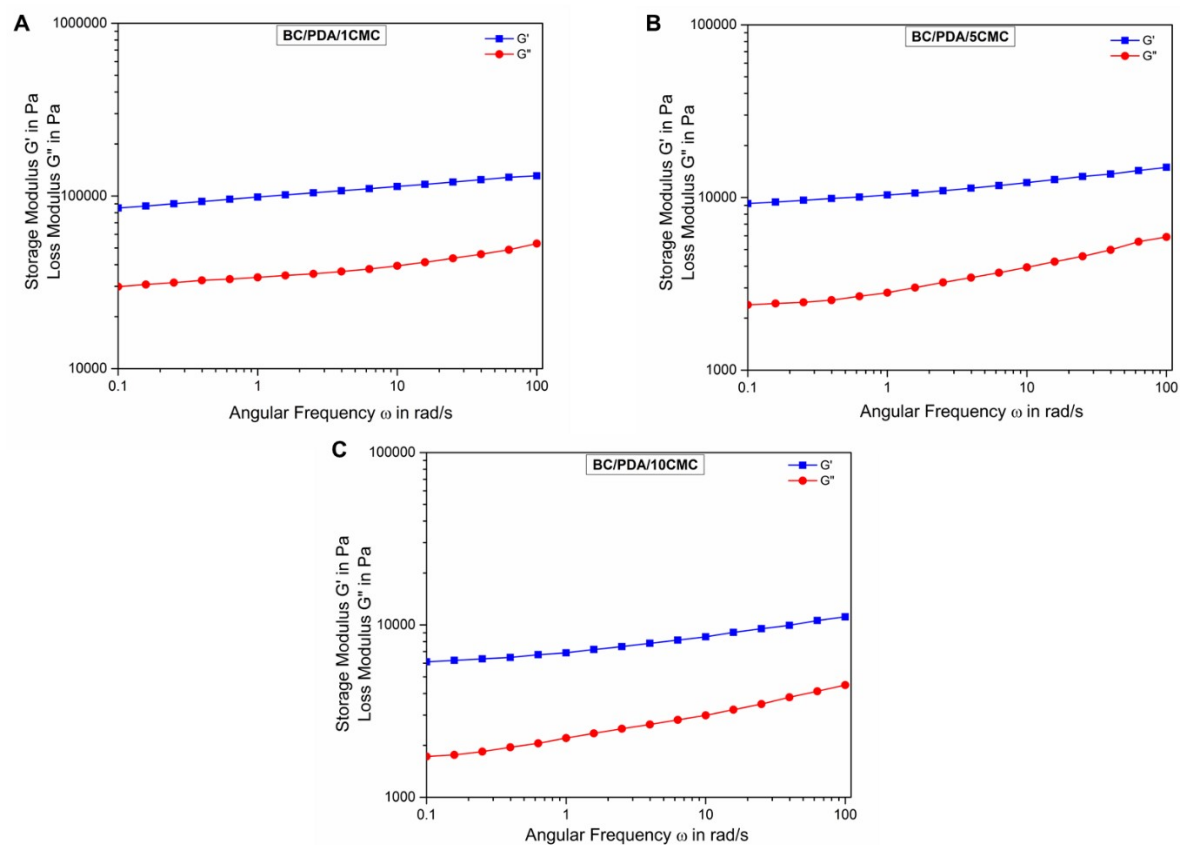

Figure S3: Frequency sweep graph of (A) BC/PDA/1CMC (B) BC/PDA/5CMC and (C) BC/PDA/10CMC samples.

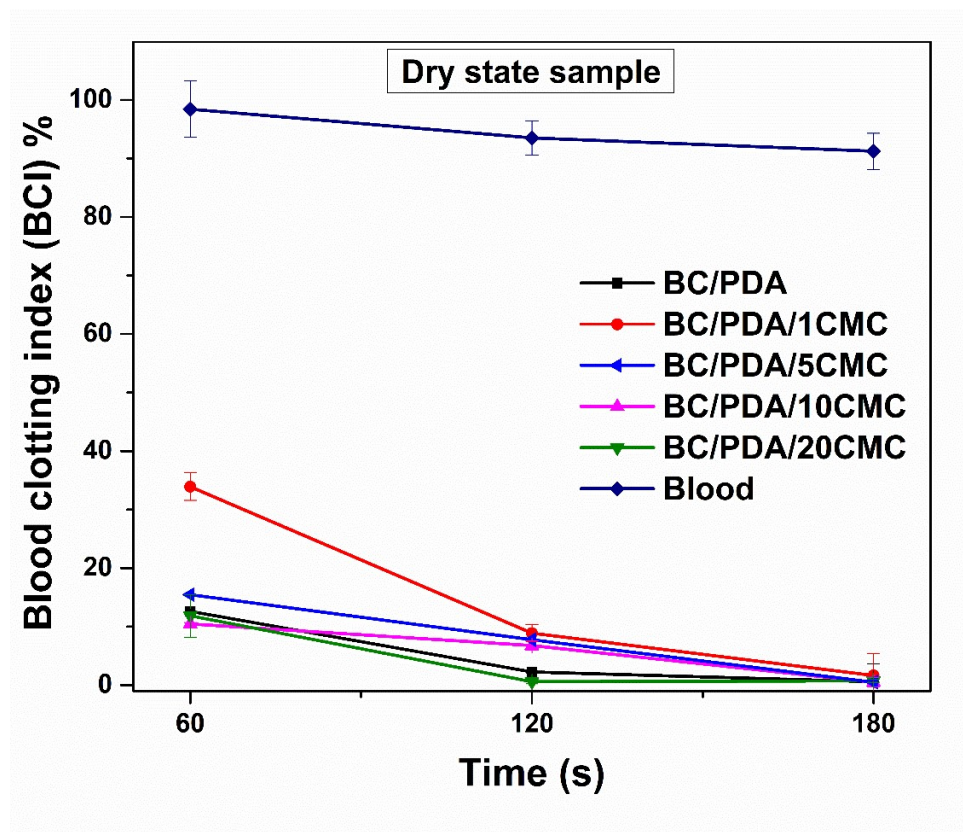

Figure S4: *In vitro* blood clotting study showing blood clotting index (BCI) at different time points on dry from of samples.

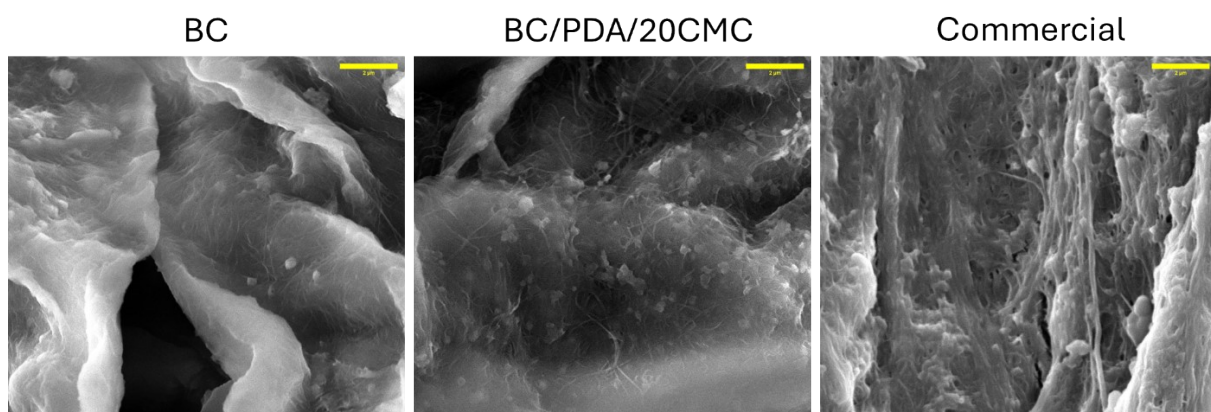

Figure S5: SEM images of platelet adhesion on samples at 7000 $\times$  magnification. of BC, BC/PDA/20CMC, and commercial. Scale bar is equal to 2  $\mu$ m.

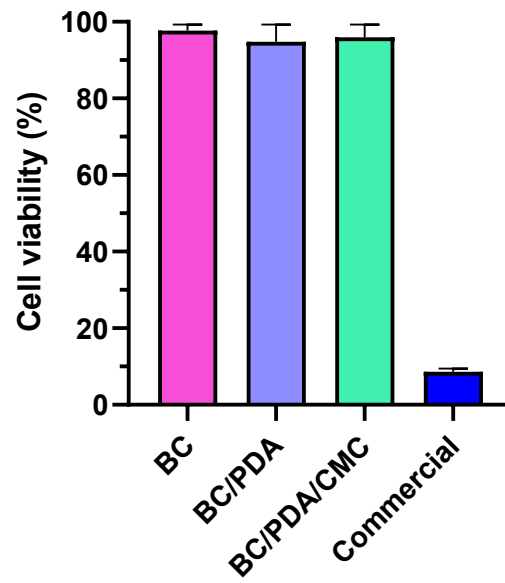

Figure S6: % Cell viability of NIH3T3 cells in presence of samples and controls using MTT assay.

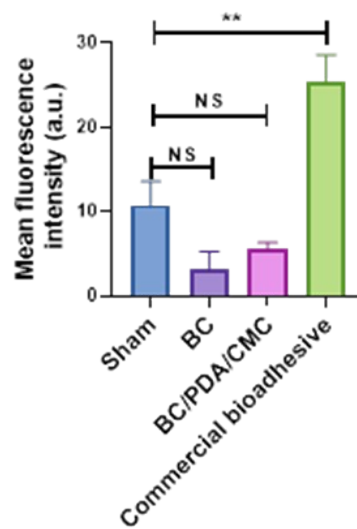

Figure S7: Semi-quantitative analysis of the expression of TNF- $\alpha$  (red).

## Supplementary Information

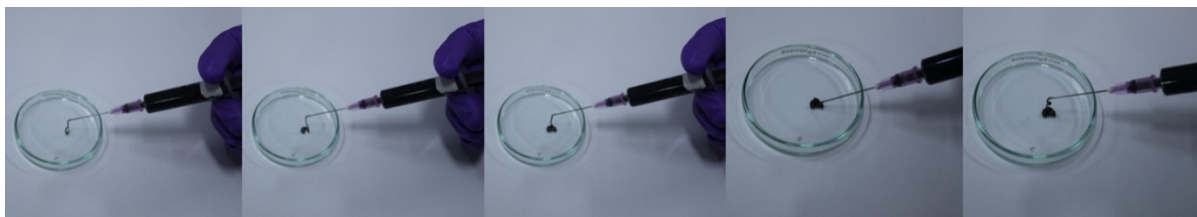

Figure S8: BC/PDA/20CMC hydrogel injecting through 2 mL syringe (23G).



## References

- 1 S. Lu, X. Zhang, Z. Tang, H. Xiao, M. Zhang, K. Liu, L. Chen, L. Huang, Y. Ni and H. Wu, *Chemical Engineering Journal*, 2021, **417**, 129329.
- 2 S. Guo, Y. Ren, R. Chang, Y. He, D. Zhang, F. Guan and M. Yao, *ACS Appl Mater Interfaces*, 2022, **14**, 34455–34469.
- 3 F. Song, Y. Kong, C. Shao, Y. Cheng, J. Lu, Y. Tao, J. Du and H. Wang, *Acta Biomater*, 2021, **136**, 170–183.
- 4 Z. Sun, X. Chen, X. Ma, X. Cui, Z. Yi and X. Li, *J Mater Chem B*, 2018, **6**, 6133–6141.
